# Supplementary material for: Uptake of Phosphate, Calcium, and Vitamin D by the Pregnant Uterus of Sheep in Late Gestation: Regulation by Chorionic Somatomammotropin Hormone
Source: MDPI journal article supplement (doi:10.3390/ijms23147795), 2022-07-14
Supplement: s1 [file s1]

Table S5. Primer Sequences.

| Gene Symbol   | Gene Name                                                        | Accession Number |     | Primer Sequence (5' → 3') | T <sub>m</sub> (°C) | Amplicon Size |
|---------------|------------------------------------------------------------------|------------------|-----|---------------------------|---------------------|---------------|
| <i>ACTB</i>   | Beta-actin                                                       | NM_001009784.3   | Fwd | CCACCGCAAATGCTTCTAGG      | 60                  | 79            |
|               |                                                                  |                  | Rev | CGTTTTCTGCGCAAGTTAGG      |                     |               |
| <i>ADAM10</i> | A Disintegrin and metalloproteinase domain-containing protein 10 | XM_004010565.4   | Fwd | TGTGCCAGTTCTGATGGCAA      | 60                  | 103           |
|               |                                                                  |                  | Rev | TCCACTGCACAGACCCTGTA      |                     |               |
| <i>ADAM17</i> | A Disintegrin and metalloproteinase domain-containing protein 17 | XM_004005676.4   | Fwd | ATGGCAAGTGTGAGAAGCGA      | 60                  | 117           |
|               |                                                                  |                  | Rev | GGACGGAACCGACGATGTTA      |                     |               |
| <i>ATP2B4</i> | Plasma membrane calcium-transporting ATPase 4                    | XM_027976182.1   | Fwd | TTGACAGCGGAAGGAGAGC       | 60                  | 117           |
|               |                                                                  |                  | Rev | CGTGGATCTTGCGGGAGTT       |                     |               |
| <i>CYP24</i>  | Cytochrome P450 Family 24 Subfamily A Member 1                   | XM_027976458.1   | Fwd | AACGGTGGCTTCAGGACAAG      | 60                  | 82            |
|               |                                                                  |                  | Rev | CGACCCACGCACATTCTTTT      |                     |               |
| <i>FGFR1</i>  | Fibroblast growth factor receptor 1                              | XM_027962628.1   | Fwd | ACAAGATGAAGAGCGGCACA      | 60                  | 107           |
|               |                                                                  |                  | Rev | GTCGGCTGACACTGTTACCT      |                     |               |
| <i>FGFR2</i>  | Fibroblast growth factor receptor 2                              | XM_027960356.1   | Fwd | CCTGCGGAGACAGGTAACAG      | 60                  | 137           |
|               |                                                                  |                  | Rev | GCAGCTCATACTCGGAGACC      |                     |               |
| <i>GAPDH</i>  | Glyceraldehyde-3-phosphate dehydrogenase                         | NM_001190390.1   | Fwd | GGGCAGCCCAGAACATCAT       | 60                  | 112           |
|               |                                                                  |                  | Rev | CCAGTGAGCTTCCCGTTTCAG     |                     |               |
| <i>KL</i>     | Klotho                                                           | XM_004012279.4   | Fwd | GCCTGCACATAGGGGACTTT      | 60                  | 120           |
|               |                                                                  |                  | Rev | CTCCAGCCACTGCGCTATAA      |                     |               |
| <i>PTHRP</i>  | Parathyroid hormone-related peptide                              | XM_004006756.3   | Fwd | CCTAGTTCGCAAAGAAGCTGAC    | 60                  | 71            |
|               |                                                                  |                  | Rev | GCAGGGCTAACTCCTTCCTA      |                     |               |
| <i>SDHA</i>   |                                                                  |                  | Fwd | CATCCACTACATGACGGAGCA     | 60                  | 90            |

|                |                                                                  |                |     |                          |    |     |
|----------------|------------------------------------------------------------------|----------------|-----|--------------------------|----|-----|
|                | Succinate dehydrogenase complex flavoprotein subunit A           | XM_027980212.1 | Rev | ATCTTGCCATCTTCAGTTCTGCTA |    |     |
| <i>SLC20A1</i> | Solute carrier family 20 member 1                                | XM_004005910.4 | Fwd | TGTGGTCTTCTATAAAAGGTGCG  | 60 | 121 |
|                |                                                                  |                | Rev | TCCATGGCGGAGAAGAGAAAG    |    |     |
| <i>SLC20A2</i> | Solute carrier family 20 member 2                                | XM_027962670.1 | Fwd | GAGGAGGTACCGATGCGAG      | 60 | 119 |
|                |                                                                  |                | Rev | TTGCCTCATGACTGAGGTCG     |    |     |
| <i>S100G</i>   | S100 calcium-binding protein G                                   | XM_004021937.3 | Fwd | GCAGCCAAAGAAGGTGATCC     | 60 | 73  |
|                |                                                                  |                | Rev | TGGGGAATTCCGTCTGAAGC     |    |     |
| <i>S100A9</i>  | S100 calcium binding protein A9                                  | XM_012181723.2 | Fwd | AGGGTCAAAGGAAGCTTGACA    | 60 | 88  |
|                |                                                                  |                | Rev | TTTGTGACAATTGGTCCGCC     |    |     |
| <i>STC1</i>    | Stanniocalcin 1                                                  | XM_004004182.4 | Fwd | ACAAGATGGCGACCAACAAA     | 60 | 104 |
|                |                                                                  |                | Rev | AGTGACGCTCCTAAGGGACT     |    |     |
| <i>STC2</i>    | Stanniocalcin 2                                                  | XM_027979996.1 | Fwd | GGTGTTTTCCCCCGAGACAT     | 60 | 96  |
|                |                                                                  |                | Rev | GAAACAAAGCAGCGGCATGA     |    |     |
| <i>TRPV6</i>   | Transient receptor potential cation channel subfamily V member 6 | XM_004008129.4 | Fwd | TTTGCGCGAGGATTCCAGAT     | 60 | 90  |
|                |                                                                  |                | Rev | CATCAGCCAGCAGAACCTCA     |    |     |
| <i>TUB</i>     | Alpha-tubulin                                                    | XM_027967380.2 | Fwd | GGTCTTCAAGGCTTCTTGGT     | 60 | 94  |
|                |                                                                  |                | Rev | CATAATCGACAGAGAGGCGT     |    |     |
| <i>VDR</i>     | Vitamin D receptor                                               | XM_027967403.1 | Fwd | AGTTCGCAAGGATGAGGACG     | 60 | 84  |
|                |                                                                  |                | Rev | CAGGAGGACGACGAGTTTCC     |    |     |
