# Supplementary material for: Uptake of Phosphate, Calcium, and Vitamin D by the Pregnant Uterus of Sheep in Late Gestation: Regulation by Chorionic Somatomammotropin Hormone
Source: MDPI journal article supplement (doi:10.3390/ijms23147795), 2022-07-14
Supplement: s1 [file s1]

**Table S4.** Correlations between fetal and placental weights and calcium, phosphate, and 25(OH)D abundance, uptake, gradients, and uteroplacental utilization.

| <b>Biometric Parameter</b> | <b>Variable</b>                            | <b>Mineral/ Metabolite</b> | <b>r</b>   | <b>P-Value</b> |
|----------------------------|--------------------------------------------|----------------------------|------------|----------------|
| Fetal Weight               | Uterine Artery (ng/mL)                     | calcium                    | 0.118      | 0.138          |
| Fetal Weight               | Uterine Vein (ng/mL)                       | calcium                    | 0.068      | 0.266          |
| Fetal Weight               | Umbilical Artery (ng/mL)                   | calcium                    | 0.044      | 0.377          |
| Fetal Weight               | Umbilical Vein (ng/mL)                     | calcium                    | 0.044      | 0.375          |
| Fetal Weight               | Uterine Uptake                             | calcium                    | 0.035      | 0.430          |
| Fetal Weight               | Umbilical Uptake (ug/min)                  | calcium                    | 0.499      | 0.0005         |
| Fetal Weight               | Uterine Artery - Umbilical Artery Gradient | calcium                    | 0.119      | 0.137          |
| Fetal Weight               | Uterine Artery - Uterine Vein Gradient     | calcium                    | 0.334      | 0.008          |
| Fetal Weight               | Umbilical Vein - Umbilical Artery Gradient | calcium                    | 0.001      | 0.877          |
| Fetal Weight               | Uteroplacental Utilization (ug/min)        | calcium                    | 0.075      | 0.243          |
| Fetal Weight               | Uterine Artery (ng/mL)                     | phosphate                  | 0.058      | 0.565          |
| Fetal Weight               | Uterine Vein (ng/mL)                       | phosphate                  | 0.022      | 0.544          |
| Fetal Weight               | Umbilical Artery (ng/mL)                   | phosphate                  | 0.089      | 0.214          |
| Fetal Weight               | Umbilical Vein (ng/mL)                     | phosphate                  | 0.015      | 0.601          |
| Fetal Weight               | Uterine Uptake                             | phosphate                  | 0.046      | 0.683          |
| Fetal Weight               | Umbilical Uptake (ug/min)                  | phosphate                  | 0.068      | 0.280          |
| Fetal Weight               | Uterine Artery - Umbilical Artery Gradient | phosphate                  | 0.0005     | 0.960          |
| Fetal Weight               | Uterine Artery - Uterine Vein Gradient     | phosphate                  | 0.133      | 0.375          |
| Fetal Weight               | Umbilical Vein - Umbilical Artery Gradient | phosphate                  | 0.003      | 0.816          |
| Fetal Weight               | Uteroplacental Utilization (ug/min)        | phosphate                  | 0.483      | 0.056          |
| Fetal Weight               | Uterine Artery (ng/mL)                     | 25(OH)D                    | 0.436      | 0.108          |
| Fetal Weight               | Uterine Vein (ng/mL)                       | 25(OH)D                    | 0.294      | 0.016          |
| Fetal Weight               | Umbilical Artery (ng/mL)                   | 25(OH)D                    | 0.033      | 0.446          |
| Fetal Weight               | Umbilical Vein (ng/mL)                     | 25(OH)D                    | 0.035      | 0.430          |
| Fetal Weight               | Uterine Uptake                             | 25(OH)D                    | 0.090      | 0.514          |
| Fetal Weight               | Umbilical Uptake (ug/min)                  | 25(OH)D                    | 0.052      | 0.336          |
| Fetal Weight               | Uterine Artery - Umbilical Artery Gradient | 25(OH)D                    | 4.024e-005 | 0.989          |
| Fetal Weight               | Uterine Artery - Uterine Vein Gradient     | 25(OH)D                    | 0.038      | 0.677          |
| Fetal Weight               | Umbilical Vein - Umbilical Artery Gradient | 25(OH)D                    | 0.004      | 0.799          |
| Fetal Weight               | Uteroplacental Utilization (ug/min)        | 25(OH)D                    | 0.030      | 0.708          |

|                  |                                            |           |            |        |
|------------------|--------------------------------------------|-----------|------------|--------|
| Placental Weight | Uterine Artery (ng/mL)                     | calcium   | 0.004      | 0.799  |
| Placental Weight | Uterine Vein (ng/mL)                       | calcium   | 0.0001     | 0.966  |
| Placental Weight | Umbilical Artery (ng/mL)                   | calcium   | 0.161      | 0.08   |
| Placental Weight | Umbilical Vein (ng/mL)                     | calcium   | 0.181      | 0.06   |
| Placental Weight | Uterine Uptake                             | calcium   | 0.033      | 0.444  |
| Placental Weight | Umbilical Uptake (ug/min)                  | calcium   | 0.319      | 0.0095 |
| Placental Weight | Uterine Artery - Umbilical Artery Gradient | calcium   | 0.098      | 0.179  |
| Placental Weight | Uterine Artery - Uterine Vein Gradient     | calcium   | 0.210      | 0.043  |
| Placental Weight | Umbilical Vein - Umbilical Artery Gradient | calcium   | 0.065      | 0.278  |
| Placental Weight | Uteroplacental Utilization (ug/min)        | calcium   | 0.037      | 0.416  |
| Placental Weight | Uterine Artery (ng/mL)                     | phosphate | 0.045      | 0.615  |
| Placental Weight | Uterine Vein (ng/mL)                       | phosphate | 3.744e-005 | 0.980  |
| Placental Weight | Umbilical Artery (ng/mL)                   | phosphate | 0.029      | 0.488  |
| Placental Weight | Umbilical Vein (ng/mL)                     | phosphate | 0.007      | 0.733  |
| Placental Weight | Uterine Uptake                             | phosphate | 0.014      | 0.824  |
| Placental Weight | Umbilical Uptake (ug/min)                  | phosphate | 0.058      | 0.324  |
| Placental Weight | Uterine Artery - Umbilical Artery Gradient | phosphate | 0.004      | 0.888  |
| Placental Weight | Uterine Artery - Uterine Vein Gradient     | phosphate | 0.007      | 0.537  |
| Placental Weight | Umbilical Vein - Umbilical Artery Gradient | phosphate | 0.034      | 0.434  |
| Placental Weight | Uteroplacental Utilization (ug/min)        | phosphate | 0.312      | 0.150  |
| Placental Weight | Uterine Artery (ng/mL)                     | 25(OH)D   | 0.038      | 0.676  |
| Placental Weight | Uterine Vein (ng/mL)                       | 25(OH)D   | 0.072      | 0.267  |
| Placental Weight | Umbilical Artery (ng/mL)                   | 25(OH)D   | 0.020      | 0.549  |
| Placental Weight | Umbilical Vein (ng/mL)                     | 25(OH)D   | 0.027      | 0.491  |
| Placental Weight | Uterine Uptake                             | 25(OH)D   | 0.001      | 0.936  |
| Placental Weight | Umbilical Uptake (ug/min)                  | 25(OH)D   | 0.014      | 0.614  |
| Placental Weight | Uterine Artery - Umbilical Artery Gradient | 25(OH)D   | 0.067      | 0.576  |
| Placental Weight | Uterine Artery - Uterine Vein Gradient     | 25(OH)D   | 0.0009     | 0.949  |
| Placental Weight | Umbilical Vein - Umbilical Artery Gradient | 25(OH)D   | 0.0001     | 0.961  |
| Placental Weight | Uteroplacental Utilization (ug/min)        | 25(OH)D   | 0.184      | 0.337  |
