# Supplementary material for: Uptake of Phosphate, Calcium, and Vitamin D by the Pregnant Uterus of Sheep in Late Gestation: Regulation by Chorionic Somatomammotropin Hormone
Source: MDPI journal article supplement (doi:10.3390/ijms23147795), 2022-07-14
Supplement: s1 [file s1]

**Table S3.** Correlations between maternal and uterine weights and calcium, phosphate, and 25(OH)D abundance, uptake, gradients, and uteroplacental utilization.

| <b>Biometric<br/>Parameter</b> |                                               | <b>Mineral/<br/>Metabolite</b> | <b>r</b> | <b>P-Value</b> |
|--------------------------------|-----------------------------------------------|--------------------------------|----------|----------------|
| Maternal Weight                | Uterine Artery (ng/mL)                        | calcium                        | 0.103    | 0.168          |
| Maternal Weight                | Uterine Vein (ng/mL)                          | calcium                        | 0.103    | 0.168          |
| Maternal Weight                | Umbilical Artery (ng/mL)                      | calcium                        | 0.006    | 0.753          |
| Maternal Weight                | Umbilical Vein (ng/mL)                        | calcium                        | 0.002    | 0.836          |
| Maternal Weight                | Uterine Uptake                                | calcium                        | 0.093    | 0.191          |
| Maternal Weight                | Umbilical Uptake (ug/min)                     | calcium                        | 0.047    | 0.360          |
| Maternal Weight                | Uterine Artery - Umbilical Artery<br>Gradient | calcium                        | 0.059    | 0.302          |
| Maternal Weight                | Uterine Artery - Uterine Vein<br>Gradient     | calcium                        | 0.003    | 0.821          |
| Maternal Weight                | Umbilical Vein - Umbilical Artery<br>Gradient | calcium                        | 0.037    | 0.416          |
| Maternal Weight                | Uteroplacental Utilization (ug/min)           | calcium                        | 0.010    | 0.676          |
| Maternal Weight                | Uterine Artery (ng/mL)                        | phosphate                      | 0.003    | 0.901          |
| Maternal Weight                | Uterine Vein (ng/mL)                          | phosphate                      | 0.016    | 0.609          |
| Maternal Weight                | Umbilical Artery (ng/mL)                      | phosphate                      | 0.002    | 0.858          |
| Maternal Weight                | Umbilical Vein (ng/mL)                        | phosphate                      | 0.055    | 0.322          |
| Maternal Weight                | Uterine Uptake                                | phosphate                      | 0.009    | 0.858          |
| Maternal Weight                | Umbilical Uptake (ug/min)                     | phosphate                      | 0.030    | 0.476          |
| Maternal Weight                | Uterine Artery - Umbilical Artery<br>Gradient | phosphate                      | 0.009    | 0.820          |
| Maternal Weight                | Uterine Artery - Uterine Vein<br>Gradient     | phosphate                      | 0.001    | 0.923          |
| Maternal Weight                | Umbilical Vein - Umbilical Artery<br>Gradient | phosphate                      | 0.072    | 0.253          |
| Maternal Weight                | Uteroplacental Utilization (ug/min)           | phosphate                      | 0.004    | 0.883          |
| Maternal Weight                | Uterine Artery (ng/mL)                        | 25(OH)D                        | 0.431    | 0.109          |
| Maternal Weight                | Uterine Vein (ng/mL)                          | 25(OH)D                        | 0.104    | 0.179          |
| Maternal Weight                | Umbilical Artery (ng/mL)                      | 25(OH)D                        | 0.008    | 0.709          |
| Maternal Weight                | Umbilical Vein (ng/mL)                        | 25(OH)D                        | 0.005    | 0.762          |
| Maternal Weight                | Uterine Uptake                                | 25(OH)D                        | 0.180    | 0.343          |
| Maternal Weight                | Umbilical Uptake (ug/min)                     | 25(OH)D                        | 0.051    | 0.338          |
| Maternal Weight                | Uterine Artery - Umbilical Artery<br>Gradient | 25(OH)D                        | 0.371    | 0.146          |
| Maternal Weight                | Uterine Artery - Uterine Vein<br>Gradient     | 25(OH)D                        | 0.138    | 0.411          |
| Maternal Weight                | Umbilical Vein - Umbilical Artery<br>Gradient | 25(OH)D                        | 0.002    | 0.858          |
| Maternal Weight                | Uteroplacental Utilization (ug/min)           | 25(OH)D                        | 0.02     | 0.762          |

|                |                                            |           |       |       |
|----------------|--------------------------------------------|-----------|-------|-------|
| Uterine Weight | Uterine Artery (ng/mL)                     | calcium   | 0.002 | 0.843 |
| Uterine Weight | Uterine Vein (ng/mL)                       | calcium   | 0.001 | 0.883 |
| Uterine Weight | Umbilical Artery (ng/mL)                   | calcium   | 0.019 | 0.564 |
| Uterine Weight | Umbilical Vein (ng/mL)                     | calcium   | 0.024 | 0.512 |
| Uterine Weight | Uterine Uptake                             | calcium   | 0.033 | 0.442 |
| Uterine Weight | Umbilical Uptake (ug/min)                  | calcium   | 0.174 | 0.067 |
| Uterine Weight | Uterine Artery - Umbilical Artery Gradient | calcium   | 0.003 | 0.818 |
| Uterine Weight | Uterine Artery - Uterine Vein Gradient     | calcium   | 0.276 | 0.017 |
| Uterine Weight | Umbilical Vein - Umbilical Artery Gradient | calcium   | 0.027 | 0.491 |
| Uterine Weight | Uteroplacental Utilization (ug/min)        | calcium   | 0.142 | 0.101 |
| Uterine Weight | Uterine Artery (ng/mL)                     | phosphate | 0.033 | 0.666 |
| Uterine Weight | Uterine Vein (ng/mL)                       | phosphate | 0.017 | 0.599 |
| Uterine Weight | Umbilical Artery (ng/mL)                   | phosphate | 0.004 | 0.799 |
| Uterine Weight | Umbilical Vein (ng/mL)                     | phosphate | 0.006 | 0.754 |
| Uterine Weight | Uterine Uptake                             | phosphate | 0.005 | 0.895 |
| Uterine Weight | Umbilical Uptake (ug/min)                  | phosphate | 0.017 | 0.599 |
| Uterine Weight | Uterine Artery - Umbilical Artery Gradient | phosphate | 0.024 | 0.712 |
| Uterine Weight | Uterine Artery - Uterine Vein Gradient     | phosphate | 0.042 | 0.626 |
| Uterine Weight | Umbilical Vein - Umbilical Artery Gradient | phosphate | 0.016 | 0.599 |
| Uterine Weight | Uteroplacental Utilization (ug/min)        | phosphate | 0.096 | 0.456 |
| Uterine Weight | Uterine Artery (ng/mL)                     | 25(OH)D   | 0.189 | 0.329 |
| Uterine Weight | Uterine Vein (ng/mL)                       | 25(OH)D   | 0.013 | 0.639 |
| Uterine Weight | Umbilical Artery (ng/mL)                   | 25(OH)D   | 0.002 | 0.862 |
| Uterine Weight | Umbilical Vein (ng/mL)                     | 25(OH)D   | 0.078 | 0.235 |
| Uterine Weight | Uterine Uptake                             | 25(OH)D   | 0.296 | 0.207 |
| Uterine Weight | Umbilical Uptake (ug/min)                  | 25(OH)D   | 0.032 | 0.451 |
| Uterine Weight | Uterine Artery - Umbilical Artery Gradient | 25(OH)D   | 0.003 | 0.904 |
| Uterine Weight | Uterine Artery - Uterine Vein Gradient     | 25(OH)D   | 0.245 | 0.258 |
| Uterine Weight | Umbilical Vein - Umbilical Artery Gradient | 25(OH)D   | 0.121 | 0.145 |
| Uterine Weight | Uteroplacental Utilization (ug/min)        | 25(OH)D   | 0.089 | 0.517 |
