# Supplementary material for: Uptake of Phosphate, Calcium, and Vitamin D by the Pregnant Uterus of Sheep in Late Gestation: Regulation by Chorionic Somatomammotropin Hormone
Source: MDPI journal article supplement (doi:10.3390/ijms23147795), 2022-07-14
Supplement: s1 [file s1]

**Table S2.** Correlations between maternal, uterine, fetal, and placental weights and the abundance of phosphate and calcium in caruncles and cotyledons.

| <b>Tissue</b> | <b>Biometric Parameter</b> | <b>Mineral</b> | <b>r</b>   | <b>P-Value</b> |
|---------------|----------------------------|----------------|------------|----------------|
| Caruncle      | Maternal Weight            | Calcium        | 0.121      | 0.133          |
| Cotyledon     | Maternal Weight            | Calcium        | 0.07       | 0.273          |
| Caruncle      | Maternal Weight            | Phosphate      | 0.001      | 0.884          |
| Cotyledon     | Maternal Weight            | Phosphate      | 0.093      | 0.205          |
| Caruncle      | Uterine Weight             | Calcium        | 0.035      | 0.432          |
| Cotyledon     | Uterine Weight             | Calcium        | 0.017      | 0.597          |
| Caruncle      | Uterine Weight             | Phosphate      | 0.028      | 0.493          |
| Cotyledon     | Uterine Weight             | Phosphate      | 0.0004     | 0.934          |
| Caruncle      | Fetal Weight               | Calcium        | 0.181      | 0.06           |
| Cotyledon     | Fetal Weight               | Calcium        | 0.002      | 0.87           |
| Caruncle      | Fetal Weight               | Phosphate      | 3.852e-005 | 0.98           |
| Cotyledon     | Fetal Weight               | Phosphate      | 0.007      | 0.737          |
| Caruncle      | Placental Weight           | Calcium        | 0.062      | 0.29           |
| Cotyledon     | Placental Weight           | Calcium        | 0.163      | 0.09           |
| Caruncle      | Placental Weight           | Phosphate      | 0.002      | 0.867          |
| Cotyledon     | Placental Weight           | Phosphate      | 0.365      | 0.006          |
