# Supplementary material for: Uptake of Phosphate, Calcium, and Vitamin D by the Pregnant Uterus of Sheep in Late Gestation: Regulation by Chorionic Somatomammotropin Hormone
Source: MDPI journal article supplement (doi:10.3390/ijms23147795), 2022-07-14
Supplement: s1 [file s1]

**Table S1.** Effect of CSH RNAi on serum phosphate abundance.

|                                                        | Control RNAi   | CSH RNAi       |                | Overall P Value |
|--------------------------------------------------------|----------------|----------------|----------------|-----------------|
|                                                        |                | Non-IUGR       | IUGR           |                 |
| <b>Uterine</b>                                         |                |                |                |                 |
| Uterine Arterial Phosphate (nmol/μl)                   | 1.861 ± 0.528  | N/A            | 1.818 ± 0.554  | >0.10           |
| Uterine Venous Phosphate (nmol/μl)                     | 1.924 ± 0.324  | 1.773 ± 0.190  | 1.677 ± 0.482  | >0.10           |
| Uterine Artery - Vein Phosphate Gradient (nmol/μl)     | 0.219 ± 0.463  | N/A            | -0.670 ± 0.686 | >0.10           |
| Uterine Phosphate Uptake (μmol/min)                    | 2075 ± 715.4   | N/A            | 1978 ± 418.9   | >0.10           |
| Uterine Phosphate Uptake per kg of Uterus (μmol/min)   | 1973 ± 655.4   | N/A            | 3824 ± 858.4   | >0.10           |
| Uterine Phosphate Uptake per kg Fetus (μmol/min)       | 419.7 ± 125.2  | N/A            | 642.3 ± 159.6  | >0.10           |
| Uterine Phosphate Uptake per kg Placenta (μmol/min)    | 3550 ± 895.1   | N/A            | 5511 ± 1856    | >0.10           |
| <b>Umbilical</b>                                       |                |                |                |                 |
| Umbilical Arterial Phosphate (nmol/μl)                 | 2.754 ± 0.239  | 2.861 ± 0.250  | 2.419 ± 0.370  | >0.10           |
| Umbilical Venous Phosphate (nmol/μl)                   | 2.443 ± 0.264  | 2.798 ± 0.367  | 2.120 ± 0.273  | >0.10           |
| Umbilical Vein – Artery Phosphate Gradient (nmol/μl)   | -0.311 ± 0.271 | -0.214 ± 0.410 | -0.299 ± 0.219 | >0.10           |
| Umbilical Phosphate Uptake (μmol/min)                  | -260.0 ± 194.2 | -261.9 ± 317.4 | 192.7 ± 96.37  | >0.10           |
| Umbilical Phosphate Uptake per kg of Uterus (μmol/min) | -301.7 ± 301.6 | -467.5 ± 499.2 | -346.4 ± 192.6 | >0.10           |
| Umbilical Phosphate Uptake per kg Fetus (μmol/min)     | -64.05 ± 51.93 | -65.76 ± 83.31 | -53.59 ± 34.94 | >0.10           |
| Umbilical Phosphate Uptake per kg Placenta (μmol/min)  | -576.0 ± 407.5 | -618.2 ± 808.2 | -410.8 ± 269.4 | >0.10           |
| <b>Uteroplacental</b>                                  |                |                |                |                 |
| Uteroplacental Phosphate Utilization (μmol/min)        | 2198 ± 823.8   | N/A            | 1506 ± 780.9   | >0.10           |

Data are presented as means  $\pm$  SEM. Different superscripts indicate statistical significance. (Control RNAi n = 4 - 10; CSH RNAi Non-IUGR n = 6; CSH RNAi IUGR n = 4). CSH, chorionic somatomammotropin; IUGR, intrauterine growth restriction; N/A, samples/results not available; RNAi, RNA interference.
